# Supplementary material for: Engineering valence-mismatched Ti4+ into Fe-based metal–organic-frameworks for enhanced photocatalytic CO2 reduction
Source: Royal Society of Chemistry journal article supplement (doi:10.1039/d4cc02714k), 2024-01-01
Supplement: d4cc02714k1.pdf [file d4cc02714k1.pdf]

1 **Supplementary Information**

2

3 **Engineering Valence-Mismatched  $Ti^{4+}$  into Fe-**  
4 **based Metal-organic-frameworks for enhanced**  
5 **Photocatalytic  $CO_2$  Reduction**

6 Rui Li<sup>1</sup>, Xiang Xue<sup>1</sup>, Minqi Wu<sup>1</sup>, Xuan Zuo<sup>1</sup>, Huilin Hu<sup>1</sup>, Guangshan Zhou,<sup>2</sup> Wang  
7 Zhang<sup>2\*</sup>, Jun Pan<sup>2\*</sup>, Xiangliang Pan<sup>1\*</sup>

8

9

10 <sup>1</sup>College of Environment, Zhejiang University of Technology, Hangzhou 310014, China

11 <sup>2</sup>College of Materials Science and Engineering, Zhejiang University of Technology,

12 Hangzhou 310014, China

13

14

15

16 E-mail: zhangwang@zjut.edu.cn (Wang Zhang); panjun0123@zjut.edu.cn (Jun Pan),

17 panxl@zjut.edu.cn (Xiangliang Pan)

18

## 19 **Experimental sections**

### 20 **1. Materials**

21 N, N-dimethylformamide (DMF, AR), sodium sulfate ( $\text{Na}_2\text{SO}_4$ , AR), alcohol (AR)  
22 and acetonitrile (MeCN, GR) were purchased from Sinopharm (Kunshan, China). Ferric  
23 chloride anhydrous ( $\text{FeCl}_3$ , AR), titanium tetraisopropanolate (TTIP) and tris(2,2'-  
24 bipyridine) chlororuthenium (II) hexahydrate (AR) were purchased from Aladdin  
25 (Shanghai, China). 2-aminoterephthalic acid ( $\text{NH}_2$ -BDC) (AR) was purchased from  
26 Macklin (Fuzhou, China). Triethanolamine (TEOA, AR) was purchased from Meryer  
27 (Shanghai, China). All of the reagents were used as received without further purification or  
28 treatment.

### 29 **2. Synthesize of photocatalysts**

#### 30 2.1. Synthesize of MIL-53- $\text{NH}_2$ (Fe).

31 Fe-MIL-53- $\text{NH}_2$  was synthesized by a traditional solvent thermal method. 1.63 g (10  
32 mmol) of  $\text{FeCl}_3$  and 2.72 g (15 mmol)  $\text{NH}_2$ -BDC were dissolved in 20 mL and 30 mL of  
33 N, N-dimethylformamide (DMF), respectively. Then, the above two solutions were mixed  
34 completely through ultrasonic treatment. The mixed solution was put into a 100 mL Teflon-  
35 lined stainless-steel autoclave and stirred at 600 r/min for 30 minutes. After stirring, the  
36 solution was injected argon gas for 10 minutes, then placed in a 150 °C oven for 24 hours.  
37 After the reaction was completed, the catalysts were collected by centrifugation, washed  
38 twice with DMF and ethanol, and then dried by freeze-drying.

#### 39 2.2. Synthesize of Ti ions doped MIL-53- $\text{NH}_2$ (Fe)

40 The synthesis process of Ti doped Fe-MIL-53- $\text{NH}_2$  was the same as that of Fe-MIL-  
41 53- $\text{NH}_2$ , except that the solution containing Fe ions is replaced with a solution containing

42 Ti/Fe ions at a certain molar ratio with the same concentration of metal ions. The molar  
43 ratio of Ti ions/Fe ions were 0.1/99.9, 0.5/99.5, 1/99 and 2/98, respectively.

### 44 **3. Standard characterization**

45 The crystal structure of Fe-MIL-53-NH<sub>2</sub> and Ti ions doped Fe-MIL-53-NH<sub>2</sub> were  
46 determined by using powder X-ray diffraction (PXRD, DX-27mini). The morphology of  
47 the catalysts can be observed through scanning electron microscopy (SEM, Nova Nano  
48 450) and transmission electron microscopy (TEM, Talos S-FEG). Photoelectrochemical  
49 testing was conducted on the catalysts on an electrochemical workstation (CHI660E,  
50 Shanghai Chenhua Device Company, China). The valence band and chemical composition  
51 of elements in the catalysts were determined by X-ray photoelectron spectroscopy (XPS).  
52 The UV-vis diffuse reflectance spectra of the catalysts were determined by using a  
53 Shimadzu UV-2700. The recombination rate of photogenerated electron-hole pairs in the  
54 photocatalysts were measured using the photoluminescence (PL) spectrum (Hitachi F-  
55 4700). The concentration of Ti and Fe ions were measured by an inductively coupled  
56 plasma optical emission spectrometer (ICP-OES).

### 57 **4. Electrochemical measurements**

58 Photocurrent, electrochemical impedance spectroscopy (EIS), and Mott-Schottky (M-  
59 S) plot were measured by the electrochemical methods using an electrochemical  
60 workstation (CHI 660E). 4 mg of photocatalyst were dispersed in a mixture solution of 1  
61 mL of ethanol and 100  $\mu$ L of 5% Nafion solution. After 30 minutes of ultrasound, 100  $\mu$ L  
62 of above solution were dropped onto the 1 $\times$ 1 cm<sup>2</sup> region of a 1 $\times$ 2 cm<sup>2</sup> Fluorine doped tin  
63 oxide glass (FTO) to prepare the working electrode. In the three electrode-measurement  
64 system, a Pt plate and an Ag/AgCl electrode were used as a counter electrode and a

65 reference electrode, respectively. 0.1 M Na<sub>2</sub>SO<sub>4</sub> was used as electrolyte. The electrolyte  
66 was bubbled with N<sub>2</sub> for 15 minutes before using. An of 300 W Xe lamp (PLS-SXE300,  
67 Perfect Light Company, Beijing China)) with an AM 1.5 filter (1000 W m<sup>-2</sup>) was employed  
68 as a light source. The test voltage was set to 0.5 V vs. Ag/AgCl. The EIS measurements  
69 were measured in the frequency range of 10<sup>-2</sup> to 10<sup>5</sup> Hz. The Mott-Schottky measurements  
70 were measured at frequencies of 1000, 1500 and 2000, respectively.

## 71 **5. Photocatalytic activity evaluation**

72 The photocatalytic CO<sub>2</sub> reduction experiments were conducted in a 400 mL top-  
73 irradiation sealed quartz reactor with cooling water (Perfect, PQ256, Beijing). The  
74 photocatalytic system contains 5 mg MOFs as a photocatalyst, 40 mL of MeCN and 0.4 mL  
75 of H<sub>2</sub>O as a solvent, 20 mg of tris(2,2'-bipyridine) chlororuthenium (II) hexahydrate as a  
76 photosensitizer, and 1 mL of TEOA as a sacrificial agent. An of 300 W Xe lamp (PLS-  
77 SXE300, Perfect Light Company, Beijing China)) with AM 1.5 filter/UVCUT420  
78 filter/BP550 filter were used as the light sources. Before light irradiation, the reactor was  
79 filled with high purity CO<sub>2</sub> and then sealed. During photocatalytic reaction, the solution  
80 was continuously stirred. The photocatalytic products were analysed by gas  
81 chromatography equipped with a TCD detector and two FID detector (GC2014C,  
82 Shimadzu). Hydrogen, oxygen and nitrogen are detected through the TCD detector. CO,  
83 CH<sub>4</sub>, C<sub>2</sub>H<sub>4</sub>, C<sub>2</sub>H<sub>6</sub>, C<sub>2</sub>H<sub>2</sub> can be detected through FID detector.

84 The method of apparent quantum yield is based on the following equation (AQE) (1).  
85 The experimental conditions were consistent with the above photocatalytic CO<sub>2</sub> reduction  
86 conditions, except for the irradiation light source. A monochromatic light with a wavelength

87 of 550 nm was used for illumination. The light intensity measured using a light intensity  
88 meter is  $0.081 \text{ W}\cdot\text{cm}^{-2}$ . The illumination area is  $56.14 \text{ cm}^2$ .

$$\begin{aligned} 89 \quad \text{AQE}(\%) &= N_e/N_p \times 100\% = [2 \times N_{\text{CO}}] / [(I \times A \times t) / (E_p \times N_A)] \times 100\% \\ 90 \quad &= [2 \times N_{\text{CO}}] / [(I \times A \times t \times \lambda) / (hc \times N_A)] \times 100\% \end{aligned}$$

91 Where  $N_e$  represents the total number of electron transfers in the reaction,  $N_p$  represents the  
92 number of incident photons,  $N_{\text{CO}}$  represents amount of produced CO (mol), I, A and t  
93 represent power density ( $\text{W}\cdot\text{cm}^{-2}$ ), light irradiation area ( $\text{cm}^2$ ) and irradiation time (s),  
94 respectively, h is Planck's constant ( $6.62 \times 10^{-34} \text{ J}\cdot\text{s}$ ), c is speed of light ( $3.0 \times 10^8 \text{ m}\cdot\text{s}^{-1}$ ), and  
95  $\lambda$  is the monochromatic wavelength (550 nm).

96

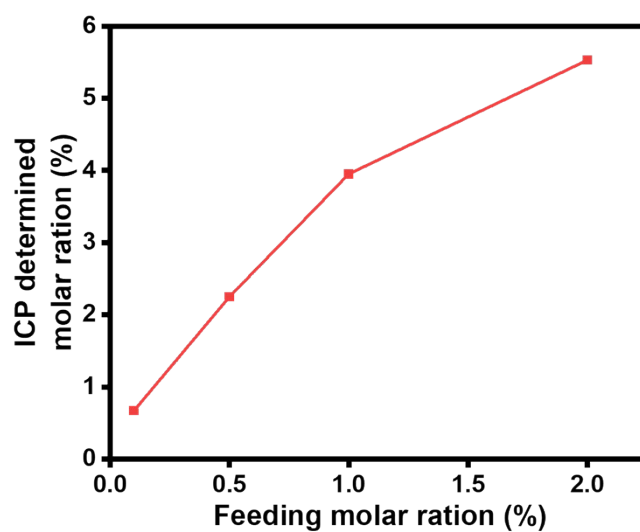

97

98 **Fig. S1.** The molar ratio of doping metals in  $\text{Fe}_x/\text{Ti}_y\text{-MIL-NH}_2$  determined by ICP-OES.

99

100

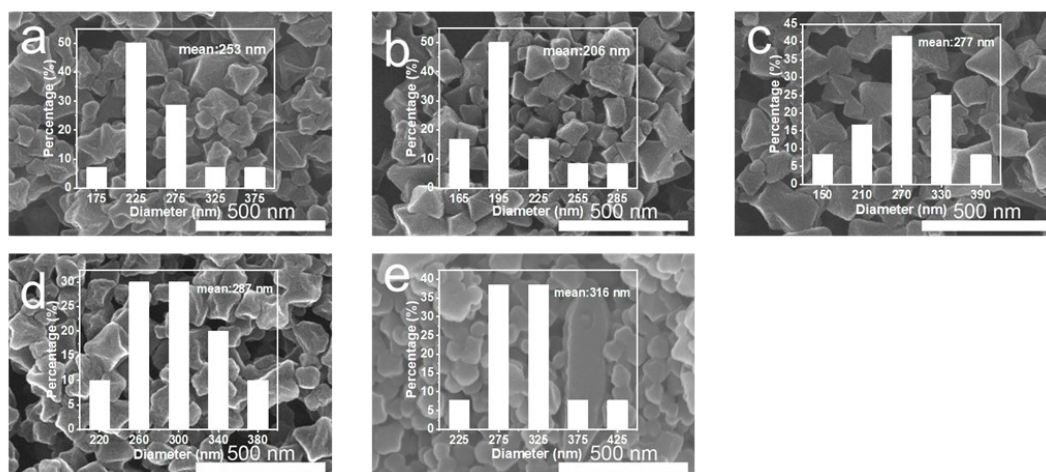

101

102 **Fig. S2.** SEM images and particle size analysis of (a) Fe-MIL-53-NH<sub>2</sub>, (b) Fe<sub>99.3</sub>/Ti<sub>0.7</sub>-MIL-

103 NH<sub>2</sub>, (c) Fe<sub>97.7</sub>/Ti<sub>2.3</sub>-MIL-NH<sub>2</sub>, (d) Fe<sub>96.6</sub>/Ti<sub>3.4</sub>-MIL-NH<sub>2</sub> and (e) Fe<sub>94.5</sub>/Ti<sub>5.5</sub>-MIL-NH<sub>2</sub>.

104

105

106

107

108

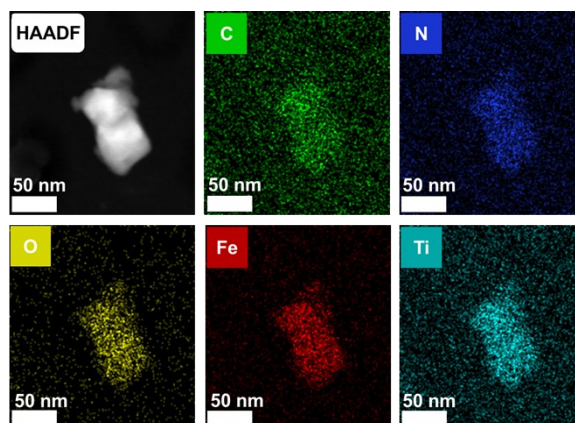

109

110 **Fig. S3.** The dark-field STEM image and corresponding elemental mapping of  $\text{Fe}_{97.5}/\text{Ti}_{2.3}$ -  
 111 MIL-NH<sub>2</sub>, showing the distribution of the C, N, O, Fe, and Ti elements. XPS spectra of  
 112  $\text{Fe}_{97.7}/\text{Ti}_{2.3}$ -MIL-NH<sub>2</sub>.  
 113

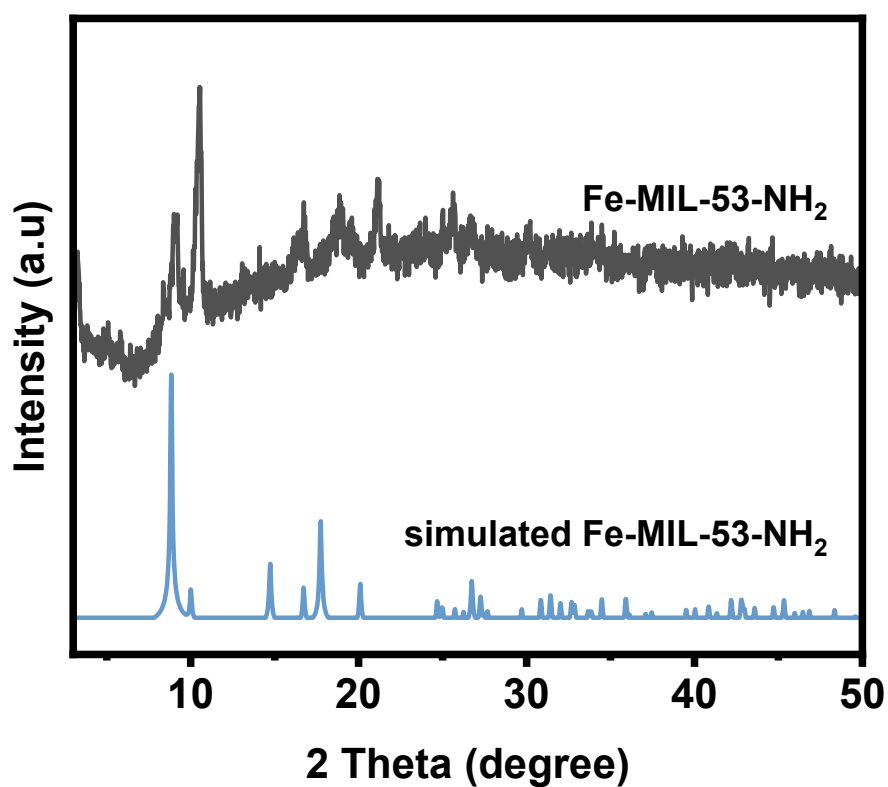

114

115 **Fig. S4.** XRD of Fe-MIL-53-NH<sub>2</sub>.  
 116

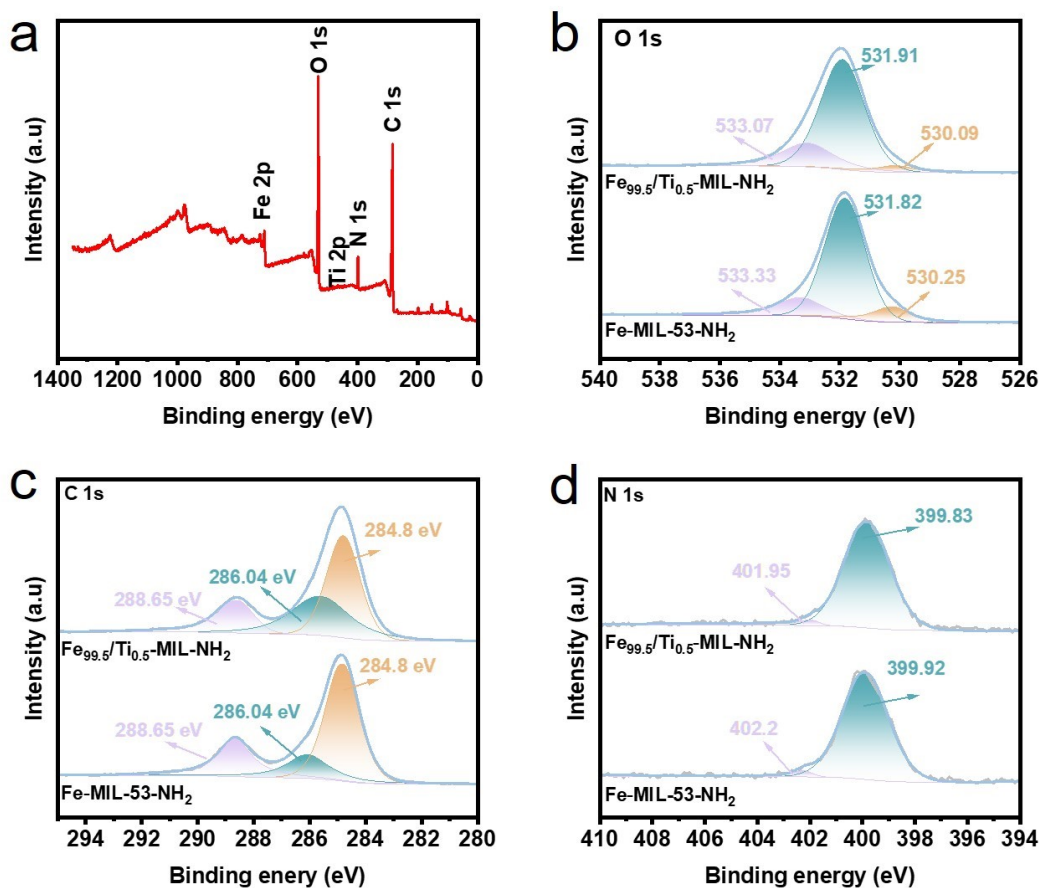

117

118 **Fig. S5.** The high-resolution XPS spectra of (a) survey scan, (b) C 1s, (c) O 1s and (d) N 1s  
 119 of Fe-MIL-53-NH<sub>2</sub> and Fe<sub>97.7</sub>/Ti<sub>2.3</sub>-MIL-NH<sub>2</sub>.

120

121 As showed in figure S5b showed the high-resolution O 1s spectra of Fe<sub>97.7</sub>/Ti<sub>2.3</sub>-  
 122 MIL-NH<sub>2</sub>, which has three characteristic peaks at 533.07, 531.91 and 530.09 eV,  
 123 correspond to -O-C=O and hydroxy species, respectively [S-1]. In figure S5c, the C 1s  
 124 high-resolution spectrum of Fe<sub>97.7</sub>/Ti<sub>2.3</sub>-MIL-NH<sub>2</sub> can be divided into three characteristic  
 125 peaks at 288.65, 286.04 and 284.8 eV, which corresponding to C-N, C=C and C-C in  
 126 phenyl, respectively[S-1].

127



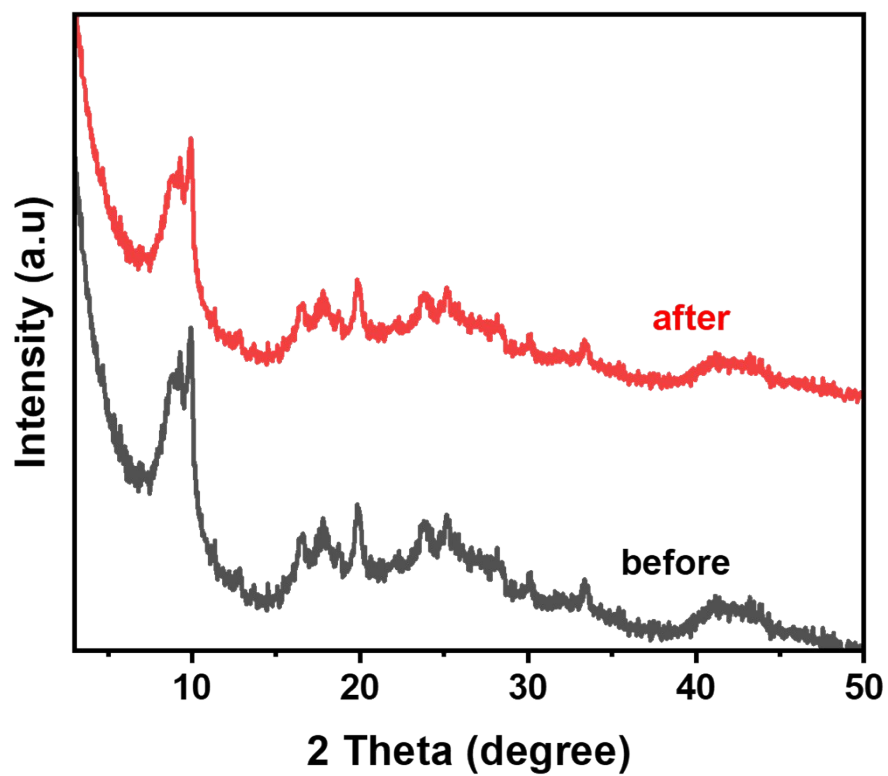

128

129 **Fig. S6.** XRD patterns of  $\text{Fe}_{97.7}/\text{Ti}_{2.3}\text{-MIL-NH}_2$  before and after photocatalytic test.

130

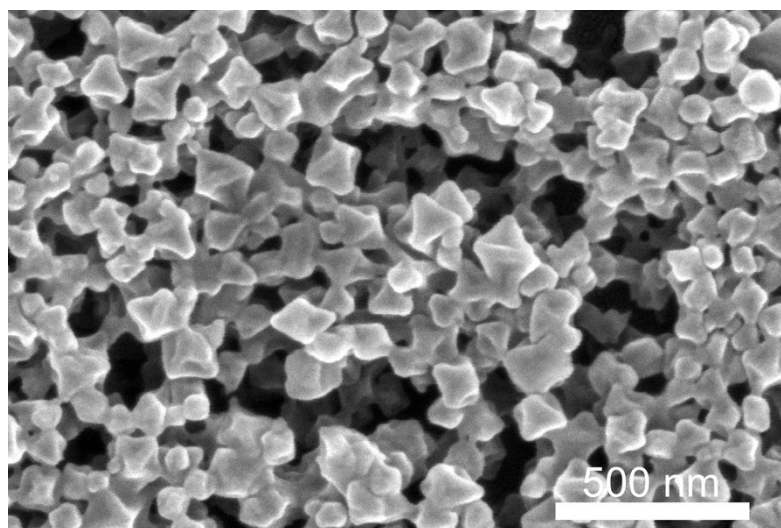

131

132 **Fig. S7.** SEM image of  $\text{Fe}_{97.7}/\text{Ti}_{2.3}\text{-MIL-NH}_2$  after photocatalytic  $\text{CO}_2$  reduction test.

133

134

135

136

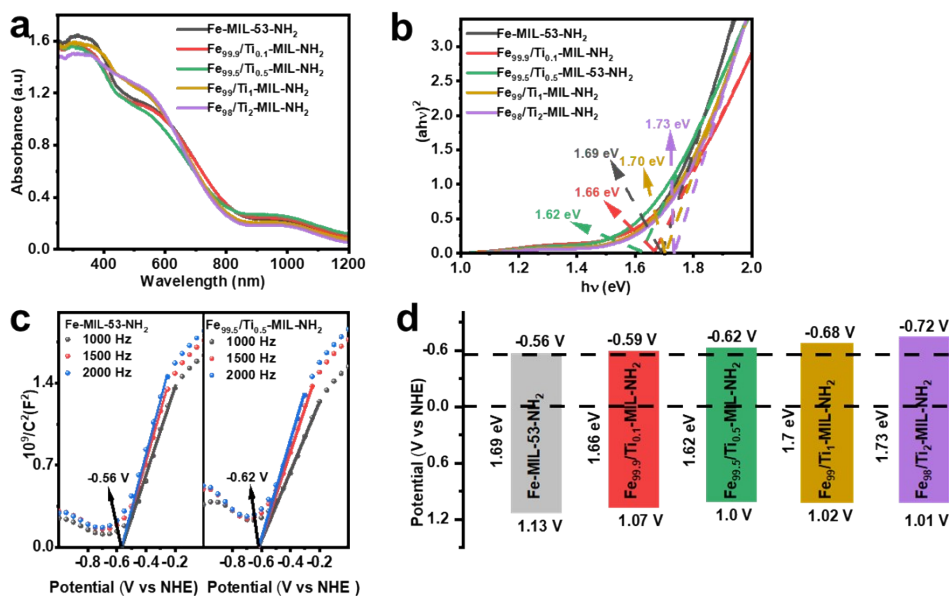

137

138 **Fig. S8.** (a) UV-vis spectra, (b) Tauc plots, (c) M-S plot and (d) energy band structures of  
 139 synthesized samples.

140

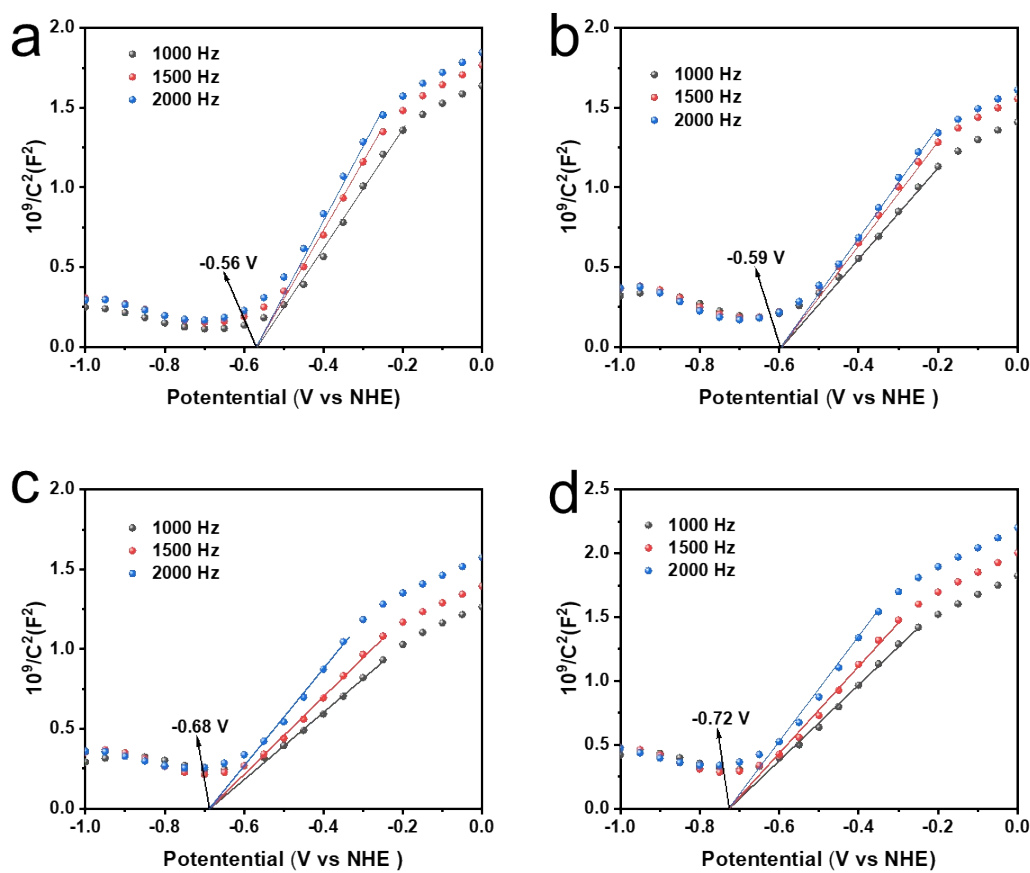

141

142 **Fig. S9.** Mott-Schottky curves of (a) Fe-MIL-53-NH<sub>2</sub>, (b) Fe<sub>99.3</sub>/Ti<sub>0.7</sub>-MIL-NH<sub>2</sub>, (c)  
 143 Fe<sub>96.6</sub>/Ti<sub>3.4</sub>-MIL-NH<sub>2</sub> and (d) Fe<sub>94.5</sub>/Ti<sub>5.5</sub>-MIL-NH<sub>2</sub>.

144

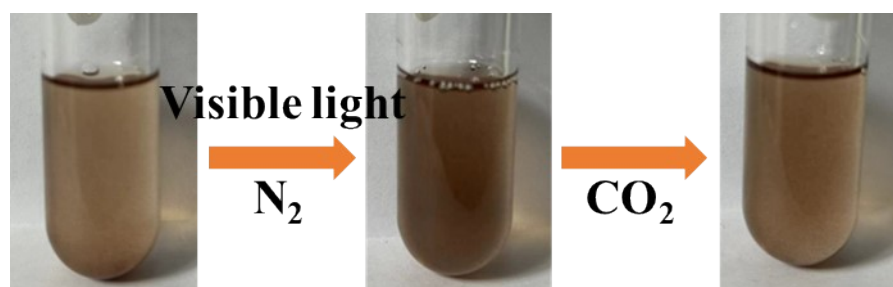

145

146

147 **Fig. S10.** Photographs of Fe<sub>97.7</sub>/Ti<sub>2.3</sub>-MIL-NH<sub>2</sub> in N<sub>2</sub> and CO<sub>2</sub> under visible light irradiation.

148

149

150

151

152

153

154 **Table S1.** The ion radius and electronegativities of Ti<sup>4+</sup> and Fe<sup>3+</sup>, as well as atomic numbers  
155 of Ti and Fe.

| Metal ion        | Radii(Å) | coordination number | atomic number | Ref.     |
|------------------|----------|---------------------|---------------|----------|
| Ti <sup>4+</sup> | 0.61     | 6                   | 22            | S-3, S-4 |
| Fe <sup>3+</sup> | 0.64     | 6                   | 26            | S-5, S-6 |

156

157 **Table S2.** Ti and Fe concentrations and the molar ratios of Ti/Fe in metal ions doped MIL-  
158 53-NH<sub>2</sub>.

| Photocatalyst                                              | ICP determined Fe concentration (g·g <sub>cat</sub> <sup>-1</sup> ) | ICP determined Ti concentration (g·g <sub>cat</sub> <sup>-1</sup> ) | ICP determined molar ration of Ti/(Fe+Ti) | Feeding molar ration of Ti/(Fe+Ti) |
|------------------------------------------------------------|---------------------------------------------------------------------|---------------------------------------------------------------------|-------------------------------------------|------------------------------------|
| Fe-MIL-53-NH <sub>2</sub>                                  | 0.0725                                                              | -                                                                   | 0                                         | 0                                  |
| Fe <sub>99.3</sub> /Ti <sub>0.7</sub> -MIL-NH <sub>2</sub> | 0.0815                                                              | 0.0005                                                              | 0.0067                                    | 0.001                              |
| Fe <sub>97.7</sub> /Ti <sub>2.3</sub> -MIL-NH <sub>2</sub> | 0.0913                                                              | 0.00177                                                             | 0.0225                                    | 0.005                              |
| Fe <sub>96.6</sub> /Ti <sub>3.4</sub> -MIL-NH <sub>2</sub> | 0.0839                                                              | 0.00284                                                             | 0.0395                                    | 0.01                               |
| Fe <sub>94.5</sub> /Ti <sub>5.5</sub> -MIL-NH <sub>2</sub> | 0.0828                                                              | 0.00393                                                             | 0.0553                                    | 0.02                               |

159

160

161 **Table S3.** Ration of Fe<sup>2+</sup>/Fe<sup>3+</sup> of Fe-MIL-53-NH<sub>2</sub> and Fe<sub>99.5</sub>Ti<sub>0.5</sub>-MIL-NH<sub>2</sub> of XPS

| Photocatalyst                                              | Area of Fe <sup>2+</sup> | Area of Fe <sup>3+</sup> | Ration of Fe <sup>2+</sup> /Fe <sup>3+</sup> |
|------------------------------------------------------------|--------------------------|--------------------------|----------------------------------------------|
| Fe-MIL-53-NH <sub>2</sub>                                  | 10863                    | 40809                    | 0.45                                         |
| Fe <sub>99.7</sub> /Ti <sub>2.3</sub> -MIL-NH <sub>2</sub> | 25621                    | 18324                    | 1.37                                         |

162

163

164 **Table S4.** Comparison of photocatalytic CO<sub>2</sub> reduction activity of Fe-based MOF  
165 photocatalysts .

| Photocatalyst                                              | Light source | Reaction conditions                                                                                                                           | Production                                                                                                       | Ref.         |
|------------------------------------------------------------|--------------|-----------------------------------------------------------------------------------------------------------------------------------------------|------------------------------------------------------------------------------------------------------------------|--------------|
| NH <sub>2</sub> -MIL-53(Fe)                                | >420 nm      | 50 mg photocatalyst<br>MeCN=50 mL<br>TEOA=10 mL                                                                                               | HCOO <sup>-</sup> =46.5<br>μmol                                                                                  | S-7          |
| Fe-MOF                                                     | >420 nm      | 0.5 mg photocatalyst<br>MeCN=40 mL<br>TEOA=10 mL<br>H <sub>2</sub> O=10 mL<br>[Ru(bpy) <sub>3</sub> ]Cl <sub>2</sub> ·6H <sub>2</sub> O=10 mg | CO=339.3<br>μmol g <sup>-1</sup> h <sup>-1</sup><br>CH <sub>4</sub> =4.6 μmol<br>g <sup>-1</sup> h <sup>-1</sup> | S-8          |
| Fe-MOX                                                     | 400-1000 nm  | 1 mg photocatalyst<br>MeCN=3mL H <sub>2</sub> O=2 mL<br>TEOA=1 mL<br>[Ru(bpy) <sub>3</sub> ]Cl <sub>2</sub> ·6H <sub>2</sub> O=7.5<br>mg      | CO=8 μmol g <sup>-1</sup><br>h <sup>-1</sup>                                                                     | S-9          |
| MIL-53 (Fe)                                                | >420 nm      | 5 mg photocatalyst<br>TEOA=2 mL<br>H <sub>2</sub> O=8 mL                                                                                      | CO=9 μmol g <sup>-1</sup><br>CH <sub>4</sub> =17 μmol<br>g <sup>-1</sup> h <sup>-1</sup>                         | S-10         |
| NH <sub>2</sub> -MIL-101(Fe)                               | 480-780 nm   | 5 mg photocatalyst<br>MeCN=14 mL<br>TEOA=1 mL                                                                                                 | CO=21.3 μmol<br>g <sup>-1</sup> h <sup>-1</sup>                                                                  | S-11         |
| MIL-88B(Fe)                                                | >420 nm      | 5 mg photocatalyst<br>H <sub>2</sub> O=2 mL                                                                                                   | CO=824 μmol<br>g <sup>-1</sup> h <sup>-1</sup>                                                                   | S-12         |
| Dye/Co-Fe-MNS                                              | >420 nm      | 5 mg photocatalyst<br>MeCN=5 mL<br>TEOA=1 mL<br>[Ru(bpy) <sub>3</sub> ]Cl <sub>2</sub> =20mg                                                  | CO=1637 μmol<br>g <sup>-1</sup> h <sup>-1</sup>                                                                  | S-13         |
| 50CN/Fe-MOF                                                | >420 nm      | 30 mg photocatalyst<br>H <sub>2</sub> O=100 mL                                                                                                | CO=19.17<br>μmol g <sup>-1</sup> h <sup>-1</sup>                                                                 | S-14         |
| Fe <sub>99.7</sub> /Ti <sub>2.3</sub> -MIL-NH <sub>2</sub> | >420 nm      | 5 mg photocatalyst<br>MeCN=40 mL, H <sub>2</sub> O=0.4 mL<br>TEOA=1 mL<br>[Ru(bpy) <sub>3</sub> ]Cl <sub>2</sub> ·6H <sub>2</sub> O=20 mg     | CO=7.24 mmol<br>g <sup>-1</sup> h <sup>-1</sup>                                                                  | This<br>work |

166 **Table S5.** Comparison of apparent quantum efficiency of Fe-based MOF photocatalysts

| Photocatalyst                                                 | Wavelength (nm) | AQE (%) | Ref       |
|---------------------------------------------------------------|-----------------|---------|-----------|
| MIL-88A                                                       | 350             | 14.8    | S15       |
| 50CN/Fe-MOF                                                   | 300             | 0.18    | S16       |
| NH <sub>2</sub> -MIL-101(Fe)@Bi <sub>2</sub> MoO <sub>6</sub> | 450             | 0.09    | S17       |
| Fe <sub>97.7</sub> /Ti <sub>2.3</sub> -MIL-NH <sub>2</sub>    | 550             | 0.82    | This work |

167

168 **References**

169 [S1] Z. Zhao, D. Yang, H. Ren, K. An, Y. Chen, Z. Zhou, W. Wang and Z. Jiang, *Chem.*  
 170 *Eng. J.*, 2020, **400**, 125929.

171 [S2] W. Xiong, Z. Zeng, X. Li, G. Zeng, R. Xiao, Z. Yang, H. Xu, H. Chen, J. Cao, C. Zhou  
 172 and L. Qin, *Chemosphere*, 2019, **232**, 186-194.

173 [S3] Q. Luo, Y. Sun, J. Guo, J. Zhang and L. Fang, *J. Sol-Gel Sci. Technol.*, 2023, **106**,  
 174 158-172.

175 [S4] T. S. Sreena, P. P. Rao, A. K. V. Raj and T. R. A. Thara, *J. Solid State Chem.*, 2019,  
 176 **278**, 120895.

177 [S5] D. Anbuselvan, S. Nilavazhagan, A. Santhanam, N. Chidhambaram, G. Kanimozhi,  
 178 T. Ahamad and S. M. Alshehri, *J. Phys.: Condens. Matter*, 2021, **33**, 094001.

179 [S6] X. Wang, Z. Kang, D. Wang, Y. Zhao, X. Xiang, H. Shang and B. Zhang, *Nano*  
 180 *Energy*, 2024, **121**, 109268.

181 [S7] D. Wang, R. Huang, W. Liu, D. Sun and Z. Li, *ACS Catal.*, 2014, **4**, 4254-4260.

182 [S8] W. Xu, G.-R. Zhang, J. Wang, H. Yu, W. Zhang, L.-L. Shen and D. Mei, *Adv. Funct.*

183 *Mater.*, 2024, **34**, 2312691.

184 [S9] K. Yang, L. Chen, X. Duan, G. Song, J. Sun, A. Chen and X. Xie, *Ceram. Int.*, 2023,  
185 **49**, 16061-16069.

186 [S10] Y. Zhang, R. Huang, Y. Fang, J. Wang, Z. Yuan, X. Chen, W. Zhu, Y. Cai and X.  
187 Shi, *Sep. Purif. Technol.*, 2024, **336**, 126164.

188 [S11] N. Liu, K. Tang, D. Wang, F. Fei, H. Cui, F. Li, J. Lei, D. Crawshaw, X. Zhang and  
189 L. Tang, *Sep. Purif. Technol.*, 2024, **332**, 125873.

190 [S12] F. Guo, R.-X. Li, S. Yang, X.-Y. Zhang, H. Yu, J. J. Urban and W.-Y. Sun, *Angew.*  
191 *Chemie. Int. Ed.*, 2023, **62**, 202216232.

192 [S13] A. Mahmoud Idris, X. Jiang, J. Tan, Z. Cai, X. Lou, J. Wang and Z. Li, *J. Colloid*  
193 *Interface Sci.*, 2022, **607**, 1180-1188.

194 [S14] X. Zhao, M. Xu, X. Song, W. Zhou, X. Liu and P. Huo, *Chinese. J. Catal.*, 2022, **43**,  
195 2625-2636.

196 [S15] N. Ojha and S. Kumar, *Appl. Catal. B: Environ*, 2021, 292, 120166.

197 [S16] X. Zhao, M. Xu, X. Song, W. Zhou, X. Liu and P. Huo, *Chin. J. Catal.*, 2022, 43,  
198 2625-2636.

199 [S17] H. Feng, Y. Sun, Q. Xu and H. Liu, *Appl. Catal. B: General*, 2023, 664, 119350.
